# Supplementary material for: Contribution of pathogenic T helper 1 and 17 cells to bursitis and tenosynovitis in polymyalgia rheumatica
Source: PubMed Central journal article supplement (PMC9402989; doi:10.3389/fimmu.2022.943574), 2022-08-11
Supplement: DataSheet_1.pdf [file DataSheet_1.pdf]

## 1. Supplementary Tables

**Supplementary Table 1. Characteristics of subjects contributing to blood analyses of patients versus controls.** Data are shown for 18 patients with new-onset PMR and 32 healthy controls that contributed to analyses presented in Figures 1 and 2. FDG-PET/CT = fluorodeoxyglucose positron emission tomography combined with low-dose computed tomography.

|                                                                                | <b>PMR patients (n=18)</b> | <b>Healthy controls (n=32)</b> |
|--------------------------------------------------------------------------------|----------------------------|--------------------------------|
| Sex, no. of females                                                            | 12 (67%)                   | 18 (56%)                       |
| Age, median (range)                                                            | 69 (54-84)                 | 71 (58-91)                     |
| Fulfilling EULAR/ACR criteria for PMR, no. of patients (%)                     | 17 (94%) <sup>a</sup>      |                                |
| FDG-PET/CT positive for PMR, no. of patients (%)                               | 15 (83%) <sup>b</sup>      |                                |
| Confirmation of PMR diagnosis after 6 months follow-up, no. of patients (%)    | 18 (100%)                  |                                |
| Exclusion of large vessel giant cell arteritis by imaging, no. of patients (%) | 17 (94%) <sup>c</sup>      |                                |
| C-reactive protein, mg/L, median (range)                                       | 42 (0.6-186) <sup>d</sup>  |                                |
| Erythrocyte sedimentation rate, mm/hr, median (range)                          | 48 (11-107)                | 10 (2-20)                      |

<sup>a</sup> One patient did not fulfil the EULAR/ACR classification criteria for PMR, but the diagnosis was confirmed by FDG-PET/CT and at least 1 year of follow-up. Classification criteria in this patient were not met due to a normal C-reactive protein level and erythrocyte sedimentation rate.

<sup>b</sup> FDG-PET/CT was performed in 15 patients. The FDG-PET/CT scan was considered positive if the Leuven Score was  $\geq 15$ , i.e. the optimal cut-off point for this composite FDG-PET/CT score in our cohort (1).

<sup>c</sup> Imaging for large vessel giant cell arteritis was done by FDG-PET/CT and/or axillary artery ultrasonography. In one patient, no imaging for large vessel GCA was performed. This patient successfully tapered and stopped glucocorticoid treatment within 9 months after diagnosis, without any relapses or subsequent reactivation of disease.

<sup>d</sup> CRP was determined in 17 patients.

**Supplementary Table 2. Characteristics of patients with PMR providing bursa fluid, tenosynovial fluid and/or bursal tissue.** Data are shown for 19 patients with active (new-onset and relapsing) PMR that contributed to analyses presented in Figures 3-6. Paired blood and bursa fluid / tenosynovial fluid were obtained from 13 patients: subacromial-subdeltoid bursa (n=9), biceps tendon sheath (n=3) and subcoracoid bursa (n=1). Bursa tissue samples were obtained from 11 patients. CRP = C-reactive protein. DMARD = disease modifying antirheumatic drug. ESR = erythrocyte sedimentation rate. FDG-PET/CT = fluorodeoxyglucose positron emission tomography combined with low-dose computed tomography.

| <b>Patients' characteristics</b>                              |                                                    | <b>Patients with PMR (n=19)</b> |
|---------------------------------------------------------------|----------------------------------------------------|---------------------------------|
| <b>Sex</b>                                                    | <i>No. of females (%)</i>                          | 14 (74%)                        |
| <b>Age</b>                                                    | <i>Median (range) years</i>                        | 69 (58-83)                      |
| <b>Disease stage</b>                                          | <i>New onset PMR, no. of patients (%)</i>          | 15 (79%)                        |
|                                                               | <i>Relapsing PMR, no. of patients (%)</i>          | 4 (21%)                         |
| <b>Fulfilling EULAR/ACR criteria for PMR</b>                  | <i>No. of patients (%)</i>                         | 17 (90%) <sup>a</sup>           |
| <b>FDG-PET/CT positive for PMR</b>                            | <i>Positive, no. of patients (%)</i>               | 8 (42%) <sup>b</sup>            |
|                                                               | <i>Negative, no. of patients (%)</i>               | 2 (11%)                         |
|                                                               | <i>Not done, no. of patients (%)</i>               | 9 (47%)                         |
| <b>Confirmation of PMR diagnosis after 6 months follow-up</b> | <i>No. of patients (%)</i>                         | 19 (100%)                       |
| <b>Imaging for large vessel giant cell arteritis</b>          | <i>Positive, no. of patients (%)</i>               | 0 (0%) <sup>c</sup>             |
|                                                               | <i>Negative, no. of patients (%)</i>               | 19 (100%)                       |
| <b>Prednisolone treatment at time of sampling</b>             | <i>No. of patients (%)</i>                         | 1 (5%)                          |
|                                                               | <i>Dose, mg</i>                                    | 2.5                             |
| <b>DMARD use at time of sampling</b>                          | <i>Leflunomide or placebo, no. of patients (%)</i> | 1 (5%) <sup>d</sup>             |
|                                                               | <i>Other DMARD, no. of patients (%)</i>            | 0 (0%)                          |
| <b>Lab at time of sampling</b>                                | <i>ESR, mm/hour, median (range)</i>                | 54 (11-89)                      |
|                                                               | <i>CRP, mg/L, median (range)</i>                   | 23 (6-118)                      |

<sup>a</sup> Two patients did not fulfil the EULAR/ACR classification criteria for PMR, but their diagnosis was confirmed by FDG-PET/CT and at least 1 year of follow-up. Classification criteria were not met due to normal CRP and ESR in one patient, and the presence of mild synovitis of the left wrist and absence of morning stiffness > 45 min in the other patient. <sup>b</sup> FDG-PET/CT was performed in 10 patients. The FDG-PET/CT scan was considered positive if the Leuven Score was  $\geq 15$ , i.e. the optimal cut-off point for this composite FDG-PET/CT score in our cohort (1). <sup>c</sup> Imaging for large vessel giant cell arteritis was done by FDG-PET/CT and/or axillary artery ultrasonography. <sup>d</sup> Patient was enrolled in a randomized-controlled trial and received either leflunomide or placebo.

**Supplementary Table 3. Antibodies for flow cytometry.**

| <b>Marker</b> | <b>Clone</b> | <b>Fluorochrome</b> | <b>Company</b> |
|---------------|--------------|---------------------|----------------|
| CD3           | OKT-3        | eFluor 605          | eBioscience    |
| CD3           | SK7          | BUV737              | BD             |
| CD4           | RPA-T4       | eFluor 450          | eBioscience    |
| CD4           | RPA-T4       | APC-H7              | BD             |
| CD8           | SK-1         | PerCP               | BD             |
| CD8           | SK-1         | PE-Cy7              | Biolegend      |
| CD45RO        | UCHL-1       | FITC                | Biolegend      |
| CCR7          | 3D12         | PE-Cy7              | BD             |
| CCR7          | 3D12         | AF747               | BD             |
| IFN- $\gamma$ | 4S.B3        | PerCP-Cy5.5         | Biolegend      |
| IFN- $\gamma$ | 4S.B3        | BV786               | BD             |
| IL-4          | 8D4-8        | PE                  | Biolegend      |
| IL-4          | 8D4-8        | PerCP-Cy5.5         | BD             |
| IL-17a        | eBio64DEC17  | FITC                | ThermoFisher   |

**Supplementary Table 4. Antibodies for immunohistochemistry.**

| <b>Marker</b> | <b>Antigen retrieval</b> | <b>Isotype</b>    | <b>Clone</b>                  | <b>Dilution</b> | <b>Secondary antibody</b>                                                        |
|---------------|--------------------------|-------------------|-------------------------------|-----------------|----------------------------------------------------------------------------------|
| CD3           | pH9                      | Mouse IgG1        | F7.2.38                       | 1:50            | Envision anti-mouse polymer-HRP (DAKO, K4006)                                    |
| CD8           | pH9                      | Rabbit monoclonal | EP1150Y                       | 1:500           | Envision anti-rabbit polymer (DAKO K4003) or Rabbit IgG VisUCyte HRP (R&D VC003) |
| CD20          | pH9                      | Mouse IgG2a       | L26                           | 1:50            | Envision anti-mouse polymer-HRP (DAKO, K4006)                                    |
| CD68          | pH9                      | Mouse IgG3        | PG-M1                         | 1:100           | Envision anti-mouse polymer-HRP (DAKO, K4006)                                    |
| IFN- $\gamma$ | pH9                      | Mouse IgG2b       | IFNG/466                      | 1:500           | Envision anti-mouse polymer-HRP (DAKO, K4006)                                    |
| IL-17         | pH9                      | Goat polyclonal   | Polyclonal (Novus, AF-317-NA) | 1:400           | Goat IgG VisUCyte HRP (R&D VC004)                                                |

**Supplementary Table 5. Antibodies for immunofluorescence.**

| <b>Marker</b>                      | <b>Secondary antibody</b>                           | <b>Tertiary antibody</b>                           | <b>Conjugate/Dye</b> |
|------------------------------------|-----------------------------------------------------|----------------------------------------------------|----------------------|
| CD3 (Mouse IgG1, 1:20)             | Rabbit anti-mouse IgG1<br>(Novus, NBP1-72793, 1:50) | Donkey anti-rabbit<br>(ThermoFisher, a31572, 1:50) | AF555                |
| IFN- $\gamma$ (Mouse IgG2b, 1:250) | Rat anti-mouse IgG2b<br>(Biolegend, RMG2b-1, 1:20)  | Donkey anti-rat IgG<br>(abcam, ab150153, 1:40)     | AF488                |
| IL-17 (Goat polyclonal, 1:400)     | Donkey anti-goat<br>(abcam, ab150129, 1:50)         | -                                                  | AF488                |

**2. Supplementary Figures**

**Supplementary Figure 1. T cell differentiation subsets in peripheral blood of patients with PMR and healthy controls.** Percentages of naive ( $T_{Naive}$ ), central memory ( $T_{CM}$ ), effector memory ( $T_{EM}$ ) and terminally differentiated ( $T_{TD}$ )  $CD4^+$  T cells and  $CD8^+$  T cells are shown for 18 patients with PMR and 32 healthy controls (HC). Median percentages for  $CD4^+$   $T_{TD}$  cells were 3.2% (range 0.6 to 49.1) in HC and 2.2% (range 0.4 to 8.8) in patients with PMR. Statistical significance by Mann-Whitney U test is indicated.

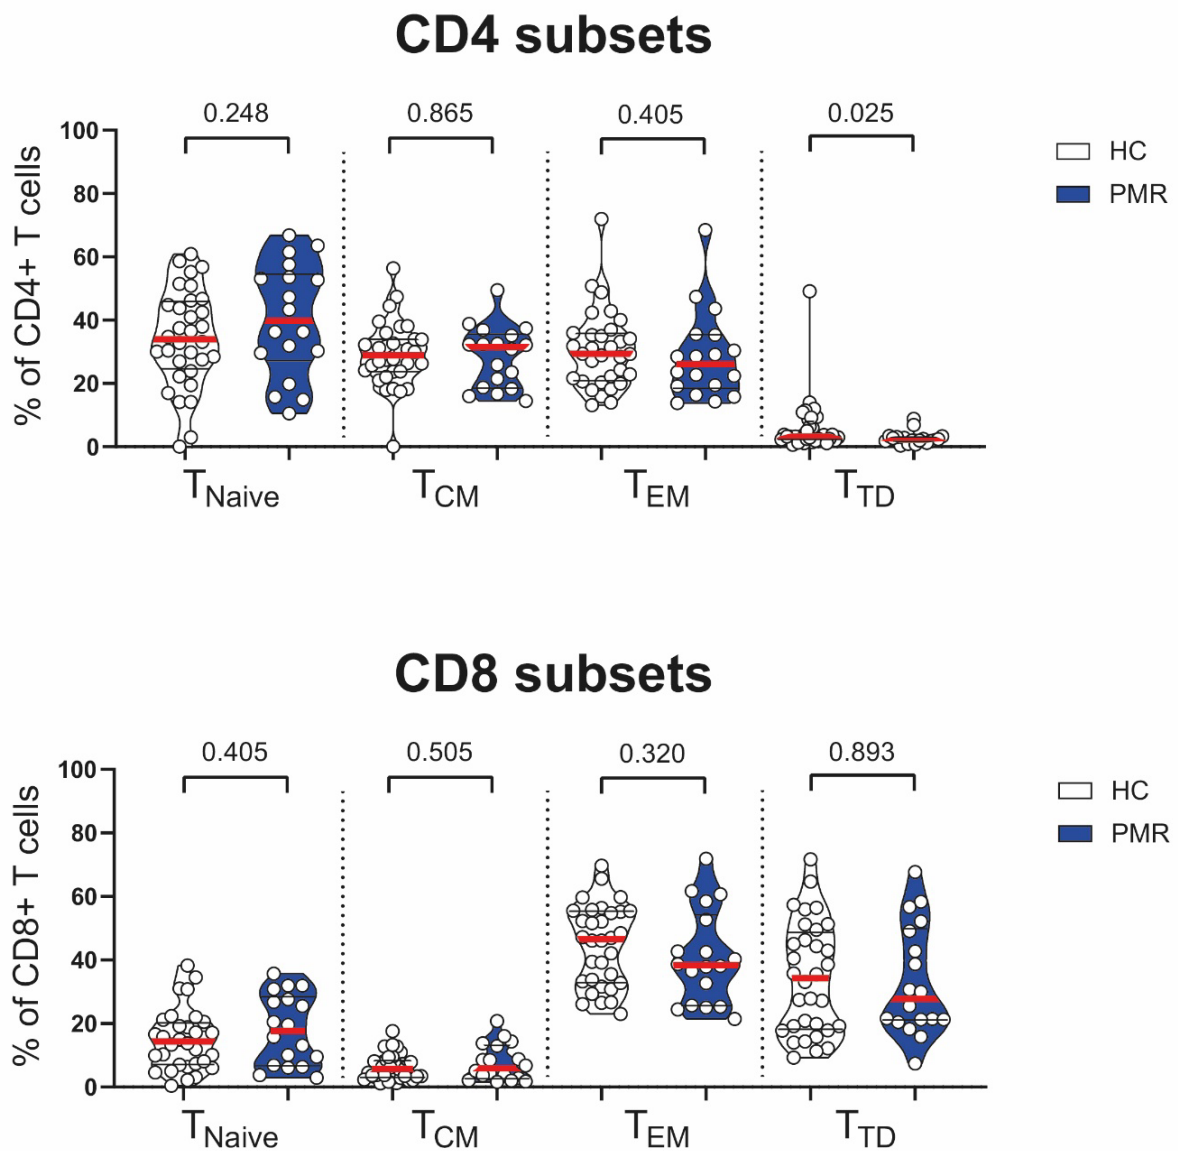

**Supplementary Figure 2. IL-4 producing T cells in peripheral blood of patients with PMR and healthy controls.** Percentages of CD4<sup>+</sup>IL-4<sup>+</sup> (T<sub>H2</sub>) and CD8<sup>+</sup>IL-4<sup>+</sup> (T<sub>C2</sub>) T cells are shown for 18 patients with PMR and 19 healthy controls. Statistical significance by Mann-Whitney U test is indicated.

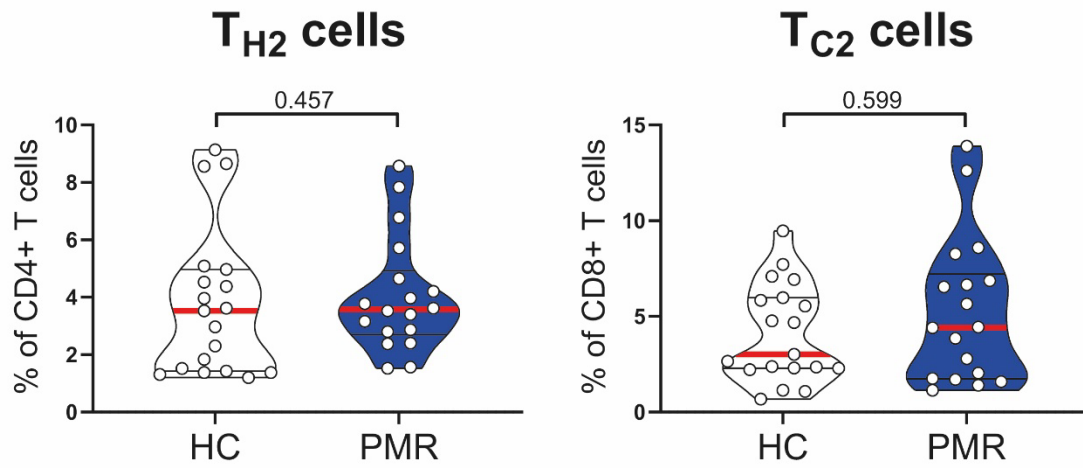

**Supplementary Figure 3. Synovial fluid T cell numbers in relation to disease stage.** Absolute numbers of CD3<sup>+</sup> T cells, CD4<sup>+</sup> T cells, CD8<sup>+</sup> T cells and CD19<sup>+</sup> B cells in peripheral blood (PB) and synovial fluid (SF) of 13 patients with PMR. Symbols indicate whether patients had new-onset or relapsing PMR. Statistical significance by Mann-Whitney U test is indicated. An additional comparison of synovial fluid T cell counts and synovial fluid B cell counts in patients with new-onset PMR versus relapsing disease revealed no differences between these patient groups, as determined by Mann-Whitney U test (data not shown).

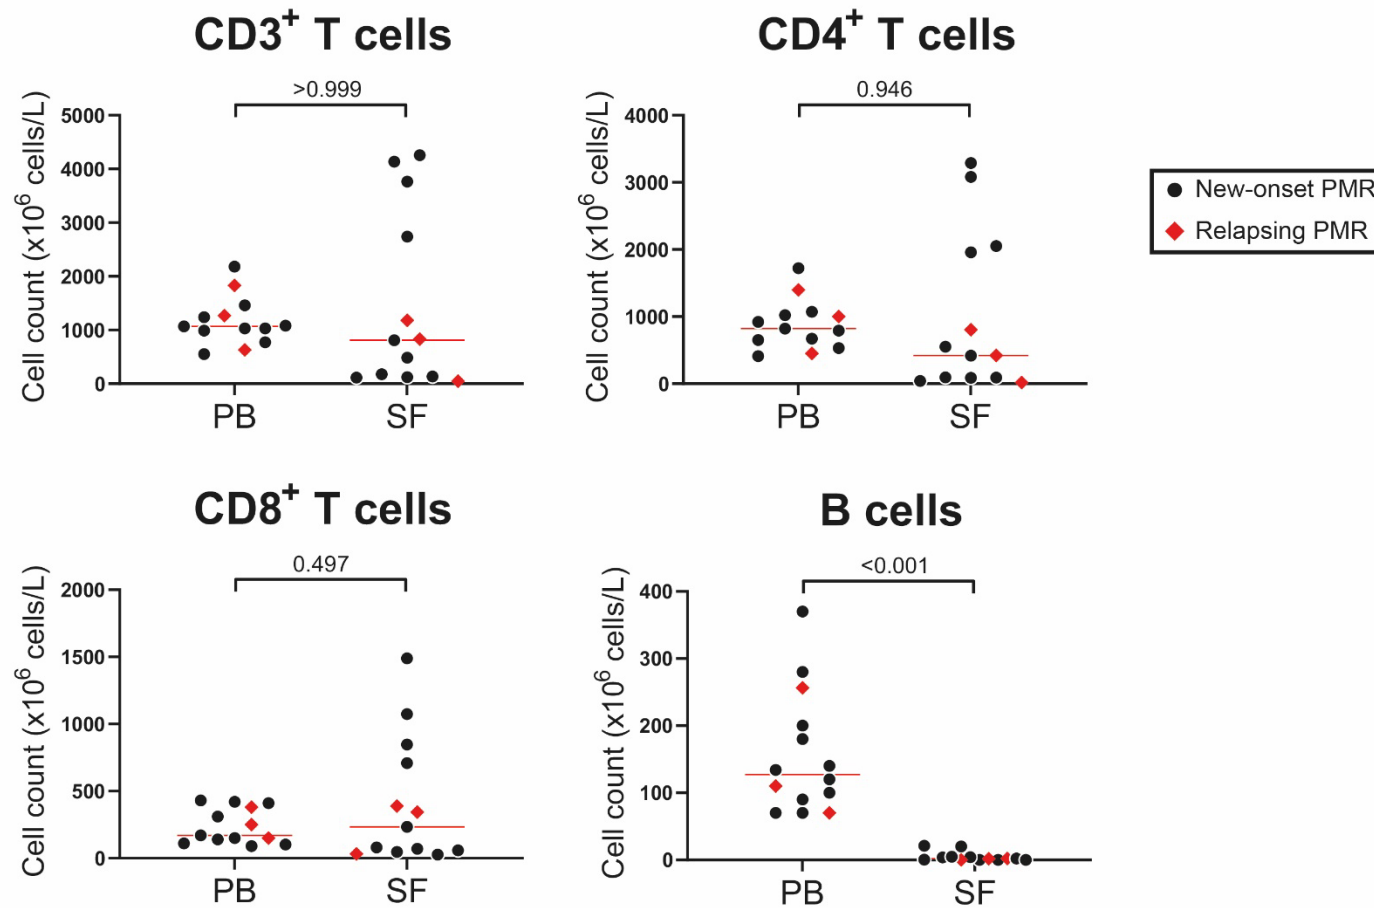



**Supplementary Figure 4. T cell differentiation subsets in peripheral blood and synovial fluid of patients with PMR.** Percentages of naive ( $T_{Naive}$ ), central memory ( $T_{CM}$ ), effector memory ( $T_{EM}$ ) and terminally differentiated ( $T_{TD}$ )  $CD4^+$  T cells and  $CD8^+$  T cells in peripheral blood (PB) and synovial fluid (SF) of 9 patients with PMR. Median percentages for  $CD4^+$   $T_{TD}$  cells were 2.0% (range 0.7 to 3.0) in PB and 0.6 (range 0.1 to 2.5) in SF. Statistical significance by Wilcoxon signed rank test is indicated.

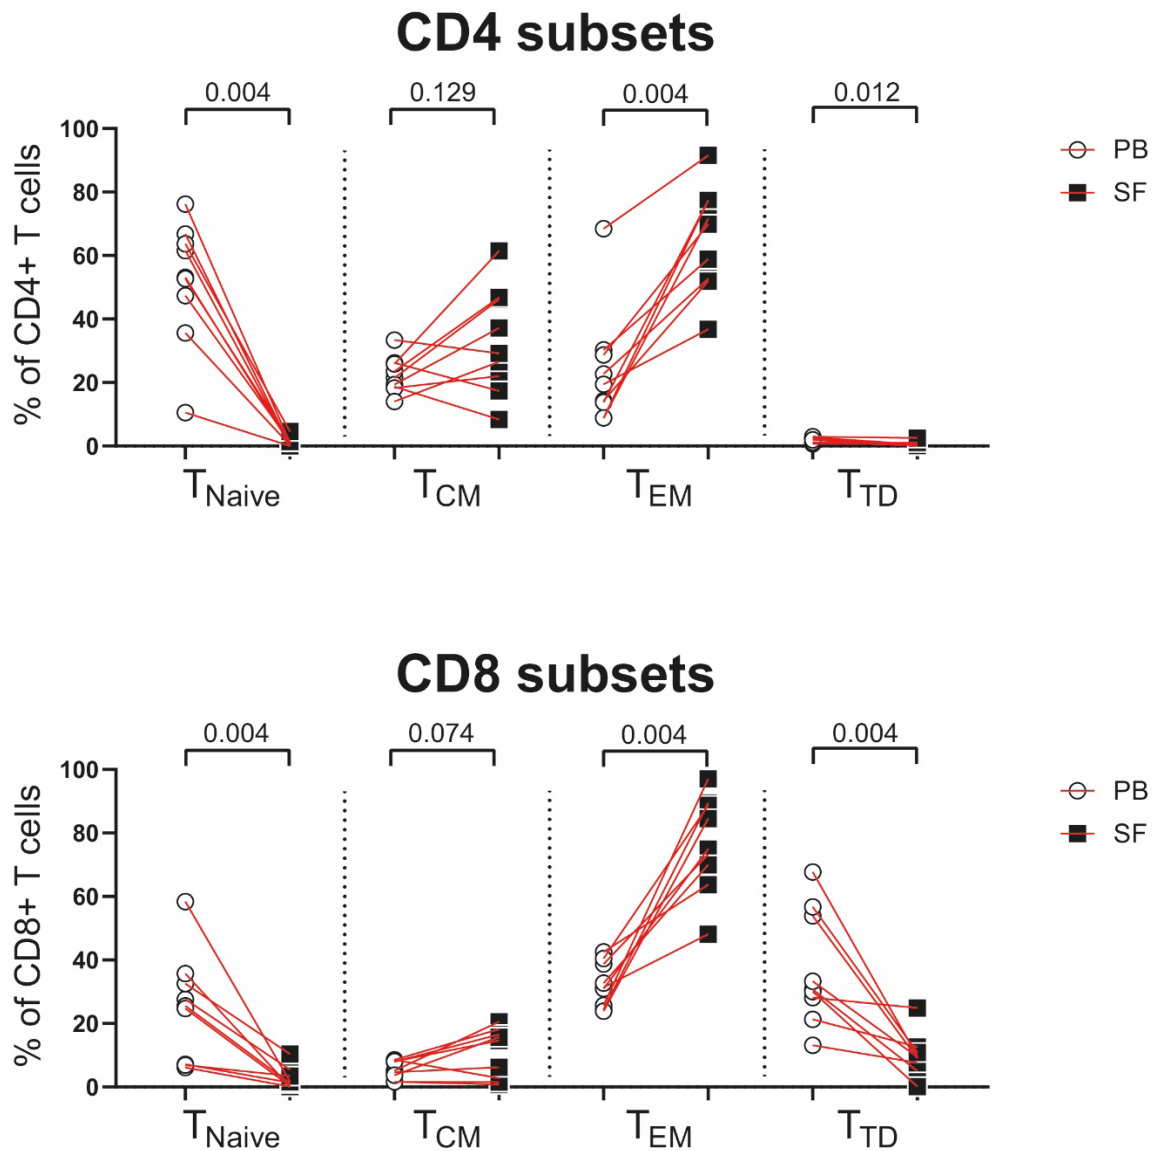

**Supplementary Figure 5. IL-4 producing T cells in peripheral blood and synovial fluid of patients with PMR.** Percentages of CD4<sup>+</sup>IL-4<sup>+</sup> (T<sub>H2</sub>) and CD8<sup>+</sup>IL-4<sup>+</sup> (T<sub>C2</sub>) T cells in peripheral blood (PB) and synovial fluid (SF) of 8 patients with PMR. Statistical significance by Wilcoxon signed rank test is indicated.

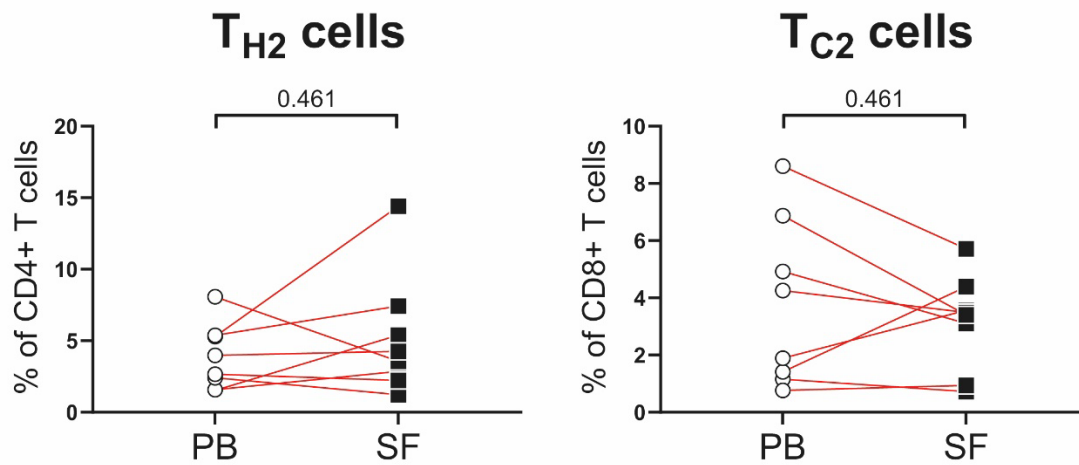

**Supplementary Figure 6. IFN- $\gamma$  and IL-17 production by synovial fluid T cells in relation to disease stage.** (A) Percentages of CD4<sup>+</sup>IFN- $\gamma$ <sup>+</sup>IL-17<sup>-</sup> (T<sub>H1</sub>), CD4<sup>+</sup>IFN- $\gamma$ <sup>+</sup>IL-17<sup>+</sup> (T<sub>H1</sub>/T<sub>H17</sub>) and CD4<sup>+</sup>IFN- $\gamma$ <sup>-</sup>IL-17<sup>+</sup> (T<sub>H17</sub>) T cells, and (B) CD8<sup>+</sup>IFN- $\gamma$ <sup>+</sup>IL-17<sup>-</sup> (T<sub>C1</sub>), CD8<sup>+</sup>IFN- $\gamma$ <sup>+</sup>IL-17<sup>+</sup> (T<sub>C1</sub>/T<sub>C17</sub>) and CD8<sup>+</sup>IFN- $\gamma$ <sup>-</sup>IL-17<sup>+</sup> (T<sub>C17</sub>) T cells in peripheral blood (PB) and synovial fluid (SF) of 8 patients with PMR. Symbols indicate whether patients had new-onset or relapsing PMR. Statistical significance by Wilcoxon signed rank test is indicated.

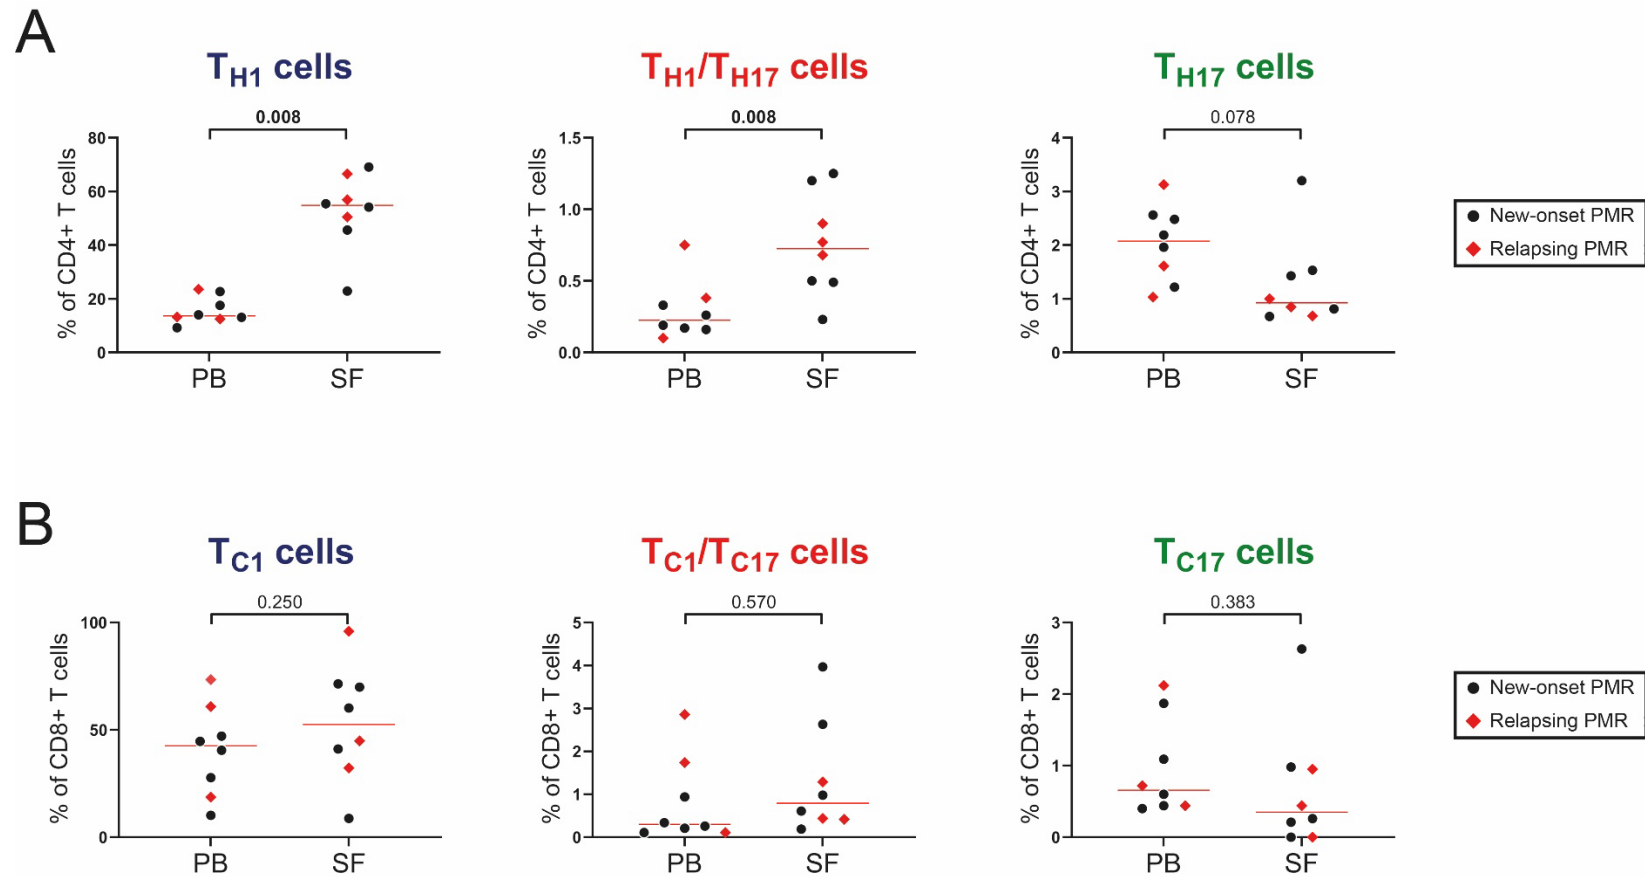

**Supplementary Figure 7. Positive tissue controls for immunohistochemistry staining.** (A) Immunohistochemistry staining for CD3, CD8, CD20 and CD68 in secondary lymphoid organ tissues and (B) knee synovium obtained from rheumatoid arthritis patients as obtained by mini-arthroscopy.

**A**

CD3 (tonsil)

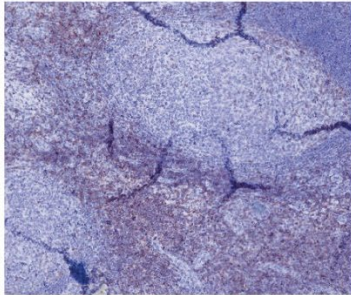

CD8 (spleen)

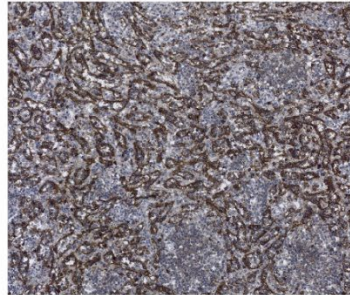

CD20 (tonsil)

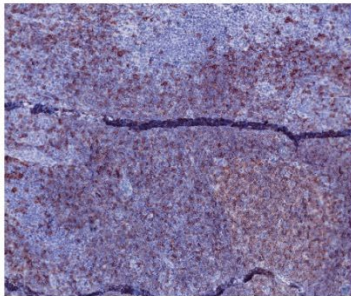

CD68 (tonsil)

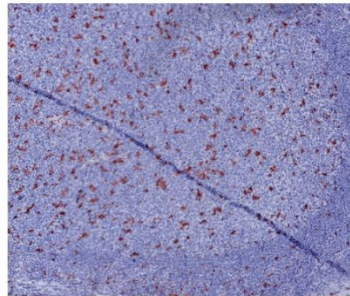

**B**

CD3 (RA synovium)

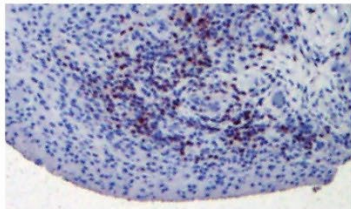

CD68 (RA synovium)

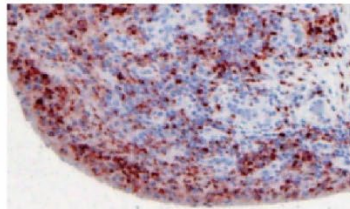

CD20 (RA synovium)

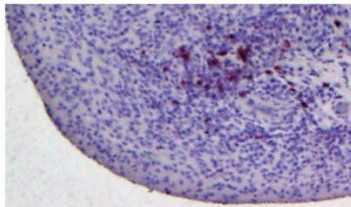

CD20 (RA synovium)

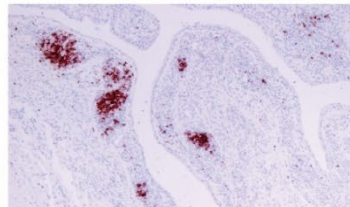

**Supplementary Figure 8. Bursa tissue T cells in relation to disease stage.** (A) Semi-quantitative scoring for CD3 and CD8 and (B) IFN- $\gamma$  and IL-17 in SASD bursa tissue biopsies of 11 patients with PMR. Scores of two independent investigators were averaged. Symbols indicate whether patients had new-onset or relapsing PMR.

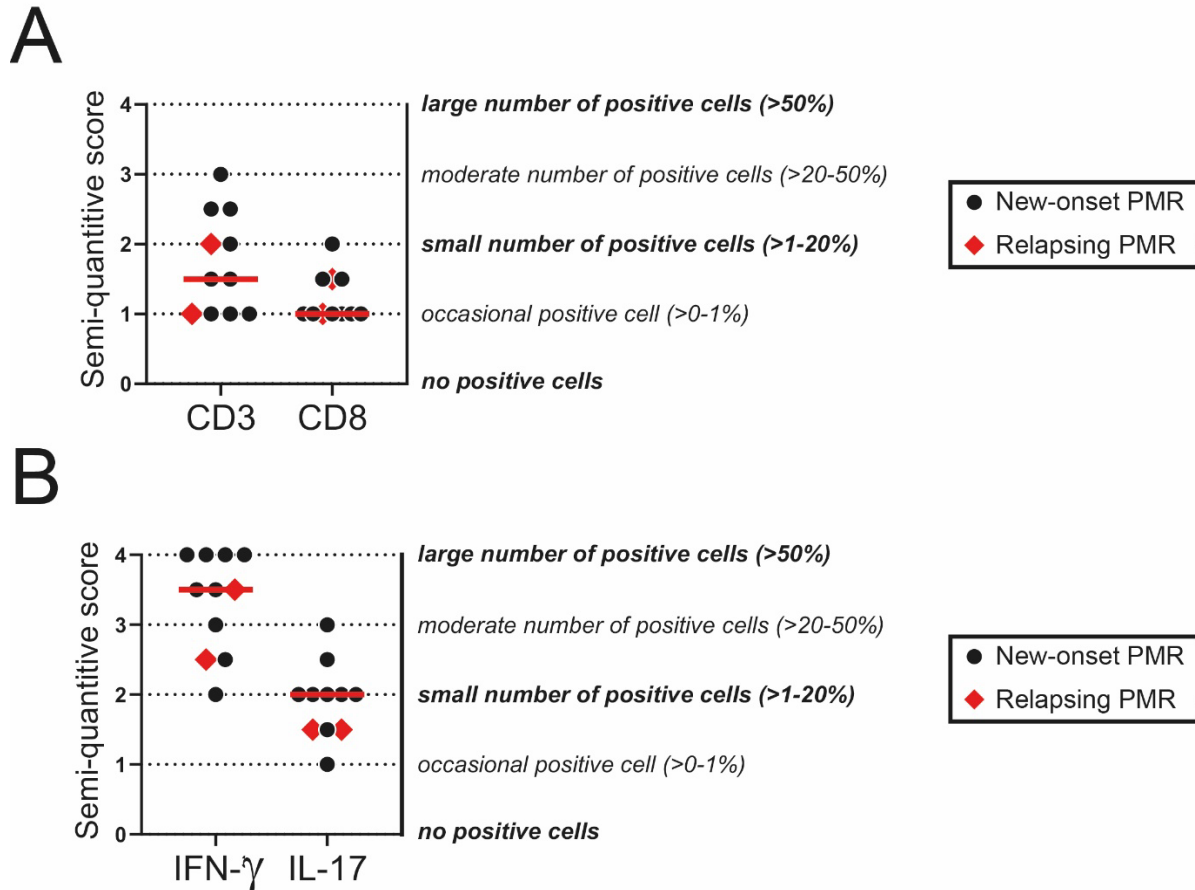

**Supplementary Figure 9. Immunofluorescence staining for IFN- $\gamma$ /CD3 and IL-17/CD3 in synovial biopsies of two additional patients.** (A) CD3 (red) and IFN- $\gamma$  (green) single staining are shown together with DAPI counterstaining (blue). Colocalization of IFN- $\gamma$ /CD3 is highlighted in yellow. (B) CD3 (red) and IL-17 (green) single staining are shown together with DAPI counterstaining (blue). Colocalization of IL-17/CD3 is highlighted in yellow. Images are shown at 40x magnification.

**A**

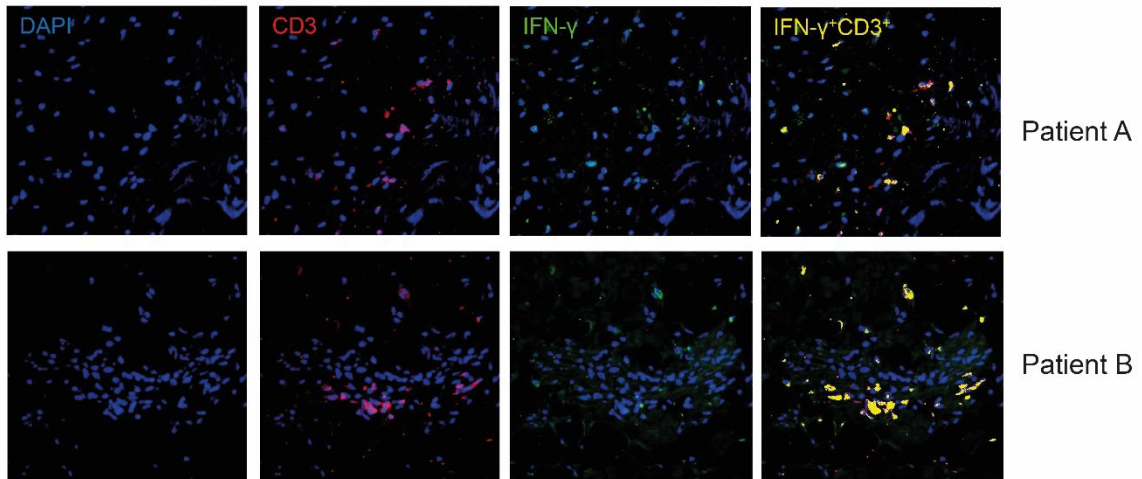

**B**

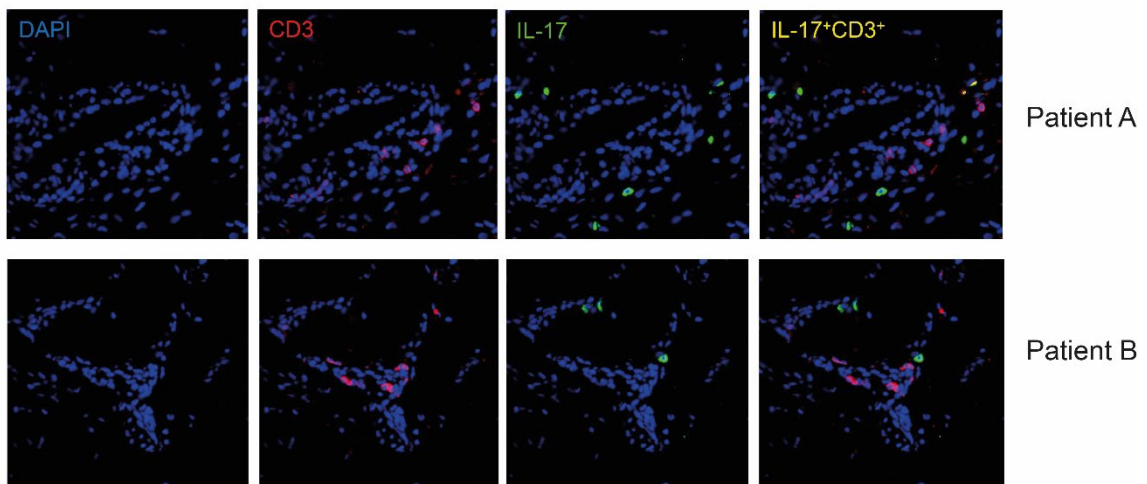

### **3. References**

(1) van der Geest KSM, van Sleen Y, Nienhuis P, Sandovici M, Westerdijk N, Glaudemans AWJM, et al. Comparison and validation of FDG-PET/CT scores for polymyalgia rheumatica. *Rheumatology (Oxford)* (2022) 61:1072-1082. doi: 10.1093/rheumatology/keab483.
